# Supplementary material for: On Theoretical Models of Gene Expression Evolution with Random Genetic Drift and Natural Selection
Source: PLOS journal article supplement (doi:10.1371/journal.pone.0007943), 2009-11-19

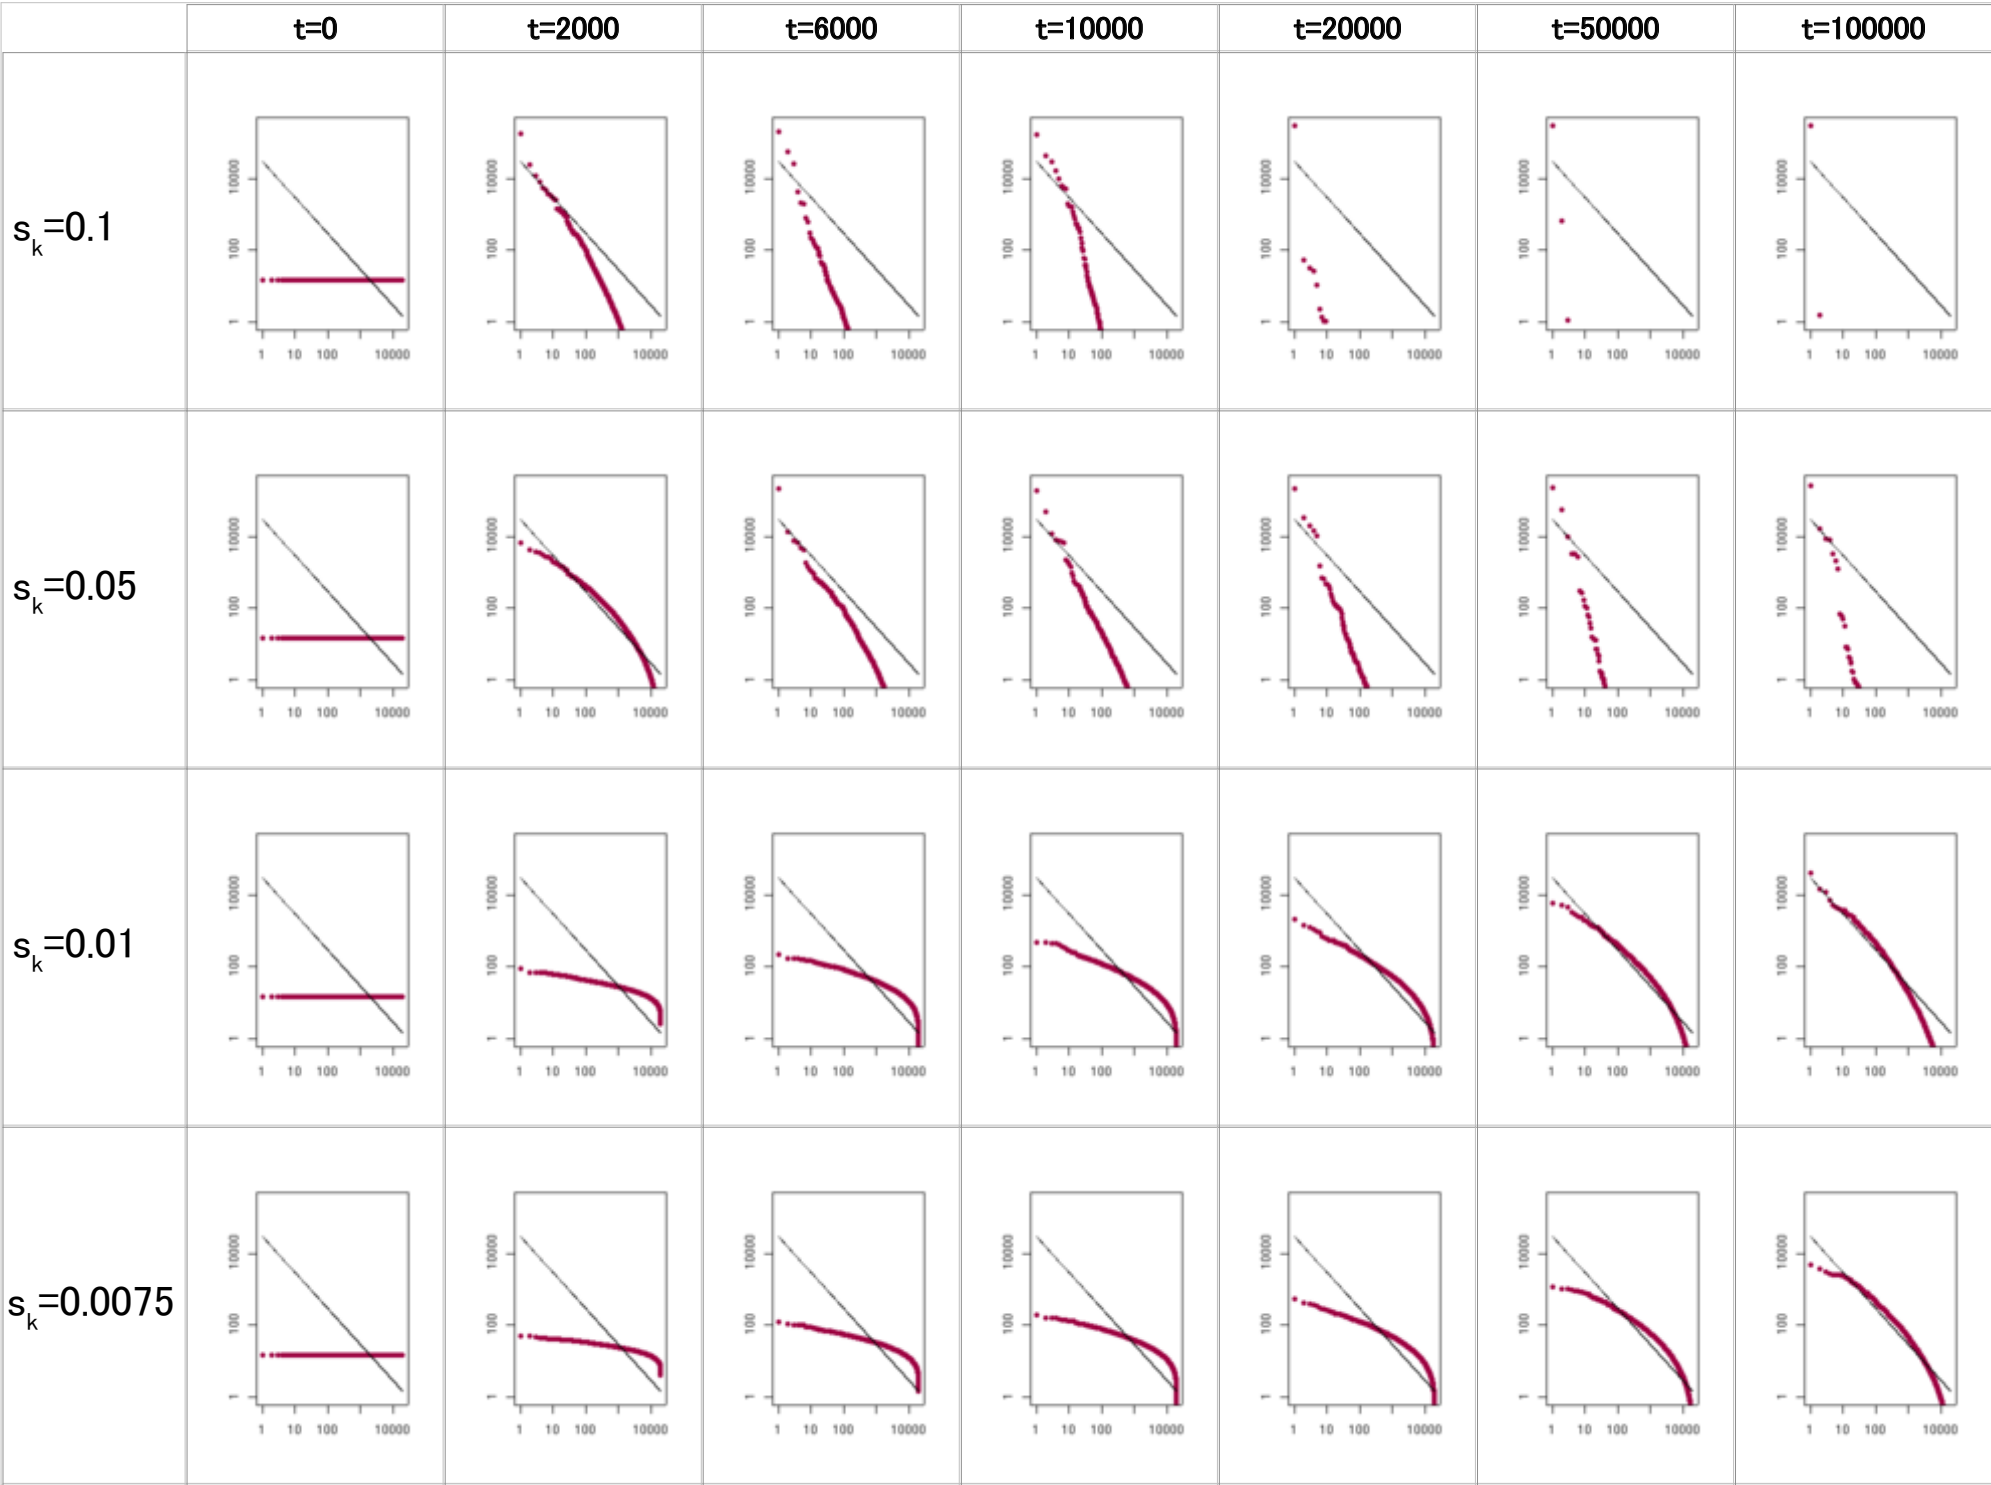

Supplement: S1 (10.1371/journal.pone.0007943.s001) [file journal.pone.0007943.s001]
